# Supplementary material for: Orthostatic stability with intravenous levodopa
Source: PeerJ. 2015 Aug 27;3:e1198. doi: 10.7717/peerj.1198 (PMC4556150; doi:10.7717/peerj.1198)
Supplement: Supplemental Information 1 — See “legend” tab for a description of variables. [file peerj-03-1198-s001.xlsx]

## Sheet: Placebo
			BASELINE										POST PLACEBO
			Supine			Standing			Change				Supine			Standing			Change
ID	Diag	Day	SBP	DBP	Pulse	SBP	DBP	Pulse	SBP	DBP	Pulse		SBP	DBP	Pulse	SBP	DBP	Pulse	SBP	DBP	Pulse
1	TFC	2	105	75	64	100	80	68	-5	5	4		117	80	56	116	70	64	-1	-10	8
2	TFC	1	106	70	80	96	68	64	-10	-2	-16		128	78	60	114	78	88	-14	0	28
3	TS	1	110	76	56	108	80	60	-2	4	4		124	80	60	130	80	60	6	0	0
4	TFC	1	136	80	83	115	77	89	-21	-3	6		122	67	80	135	117	72	13	50	-8
5	TFC	2	114	74	61	125	86	73	11	12	12		123	86	64	107	85	80	-16	-1	16
6	TFC	1	127	82	76	123	95	81	-4	13	5		107	75	73	106	82	73	-1	7	0
7	TS	2	116	60	60	116	66	64	0	6	4		110	56	68	104	70	80	-6	14	12
8	TS	1	93	64	70	102	67	78	9	3	8		103	56	74	105	78	80	2	22	6
9	TS	2	116	52	73	117	68	80	1	16	7		133	79	71	114	82	81	-19	3	10
10	TS	2	108	60	60	120	76	56	12	16	-4		106	60	52	112	70	60	6	10	8
11	TS	1	125	75	48	120	80	64	-5	5	16		125	80	44	125	95	64	0	15	20
12	TS	1	105	64	64	119	103	77	14	39	13		109	71	49	109	63	67	0	-8	18
13	TS	1	116	73	50	113	80	64	-3	7	14		122	80	55	130	84	63	8	4	8
14	TS	1	116	65	68	115	80	88	-1	15	20		110	65	60	110	75	84	0	10	24
15	TS	2	138	84	64	149	92	88	11	8	24		135	83	57	146	94	86	11	11	29
16	TS	2	116	65	57	116	69	74	0	4	17		119	72	51	112	60	61	-7	-12	10
17	TS	1	124	80	64	136	70	75	12	-10	11		129	91	68	134	95	76	5	4	8
18	TS	2	110	57	62	107	73	87	-3	16	25		120	80	74	100	82	71	-20	2	-3
19	TFC	1	134	84	80	132	80	88	-2	-4	8		142	80	64	142	80	76	0	0	12
20	TFC	2	132	70	60	122	86	60	-10	16	0		136	76	52	not done	not done	not done	#VALUE!	#VALUE!	#VALUE!
21	TFC	2	120	75	68	110	80	80	-10	5	12		120	85	64	125	90	72	5	5	8
22	TFC	1	135	76	54	136	76	75	1	0	21		141	78	51	135	84	70	-6	6	19
23	TFC	1	138	68	56	123	75	68	-15	7	12		123	73	52	132	87	76	9	14	24
24	TFC	2	not done	not done	not done	123	67	66	#VALUE!	#VALUE!	#VALUE!		117	68	53	106	69	78	-11	1	25
25	TFC	2	106	58	60	102	70	64	-4	12	4		98	60	64	102	60	56	4	0	-8
26	TFC	2	128	67	74	107	83	78	-21	16	4		118	44	60	109	80	67	-9	36	7
27	TFC	1	122	80	84	110	90	112	-12	10	28		143	104	83	149	115	100	6	11	17
28	TFC	2	126	70	52	111	83	60	-15	13	8		119	76	51	119	89	64	0	13	13
29	TFC	2	118	65	66	118	76	72	0	11	6		115	71	58	116	72	74	1	1	16

## Sheet: Levodopa
			BASELINE										POST LEVODOPA
			Supine			Standing			Change				Supine			Standing			Change
ID	Diag	Day	SBP	DBP	Pulse	SBP	DBP	Pulse	SBP	DBP	Pulse		SBP	DBP	Pulse	SBP	DBP	Pulse	SBP	DBP	Pulse
1	TFC	1	120	80	64	115	95	80	-5	15	16		124	84	60	110	100	76	-14	16	16
2	TFC	2	124	72	64	116	70	64	-8	-2	0		92	50	68	82	40	76	-10	-10	8
3	TS	2	106	66	64	102	76	68	-4	10	4		124	80	60	120	80	64	-4	0	4
4	TFC	2	138	77	79	105	93	94	-33	16	15		123	82	80	113	86	81	-10	4	1
5	TFC	1	121	74	62	154	74	80	33	0	18		120	90	71	146	101	71	26	11	0
6	TFC	2	124	85	84	141	97	83	17	12	-1		120	81	76	135	73	75	15	-8	-1
7	TS	1	118	60	62	104	80	58	-14	20	-4		122	70	60	Not Done	Not Done	68	#VALUE!	#VALUE!	8
8	TS	2	100	72	80	104	77	88	4	5	8		101	65	73	99	70	86	-2	5	13
9	TS	1	107	58	74	109	58	87	2	0	13		107	62	65	122	60	78	15	-2	13
10	TS	1	116	66	52	132	74	72	16	8	20		124	60	56	120	70	68	-4	10	12
11	TS	2	108	62	45	125	63	61	17	1	16		110	73	60	123	76	56	13	3	-4
12	TS	2	106	63	67	101	79	80	-5	16	13		106	74	45	101	72	74	-5	-2	29
13	TS	2	116	74	56	112	87	84	-4	13	28		120	77	53	119	71	78	-1	-6	25
14	TS	2	106	66	68	106	66	68	0	0	0		108	60	60	106	66	84	-2	6	24
15	TS	1	141	62	55	122	68	61	-19	6	6		124	79	51	135	70	86	11	-9	35
16	TS	1	120	71	60	99	72	82	-21	1	22		118	67	58	101	81	86	-17	14	28
17	TS	2	112	82	60	108	92	76	-4	10	16		126	90	76	104	90	84	-22	0	8
18	TS	1	121	74	64	131	94	106	10	20	42		120	76	64	128	101	78	8	25	14
19	TFC	2	130	80	68	130	80	80	0	0	12		126	80	64	138	90	76	12	10	12
20	TFC	1	136	78	64	120	80	56	-16	2	-8		134	80	56	144	74	60	10	-6	4
21	TFC	1	118	78	76	118	84	76	0	6	0		124	80	64	118	70	60	-6	-10	-4
22	TFC	2	129	81	60	148	87	88	19	6	28		124	87	52	141	84	80	17	-3	28
23	TFC	2	140	69	73	135	83	86	-5	14	13		129	78	61	121	83	91	-8	5	30
24	TFC	1	129	69	58	121	77	78	-8	8	20		126	76	53	121	65	64	-5	-11	11
25	TFC	1	108	60	60	106	76	60	-2	16	0		116	70	60	106	70	60	-10	0	0
26	TFC	1	121	47	72	121	84	88	0	37	16		119	77	61	116	72	70	-3	-5	9
27	TFC	2	112	80	76	98	80	72	-14	0	-4		120	86	72	110	80	72	-10	-6	0
28	TFC	1	116	71	55	129	92	77	13	21	22		120	72	54	112	91	76	-8	19	22
29	TFC	1	107	63	70	105	77	80	-2	14	10		105	65	72	107	72	84	2	7	12

## Sheet: Subjects
ID	Diagnosis	Handedness	Age	Education	Sex	Ethnicity
1	TFC	Right	47	14	F	AA
2	TFC	Right	47	16	F	C
3	TS	Left	51	12	M	C
4	TFC	Right	54	20	M	C
5	TFC	Right	21	15	M	C
6	TFC	Left	52	13	M	C
7	TS	Right	22	15	M	C
8	TS	Right	20	12	M	C
9	TS	Right	19	14	M	C
10	TS	Right	31	20	M	C
11	TS	Right	22	14	M	C
12	TS	Right	36	20	M	AS/C
13	TS	Right	44	16	M	C
14	TS	Right	23	17	F	C
15	TS	Left	31	14	M	C
16	TS	Right	25	16	F	C
17	TS	Left	40	14	F	C
18	TS	Right	24	14	M	C
19	TFC	Right	18	13	M	C
20	TFC	Right	22	16	M	C
21	TFC	Right	31	20	M	AS/C
22	TFC	Right	26	16	M	AA
23	TFC	Right	36	16	M	C
24	TFC	Right	45	16	M	C
25	TFC	Right	23	16	F	C
26	TFC	Left	32	14	M	C
27	TFC	Right	25	17	F	C
28	TFC	Left	41	16	F	C
29	TFC	Right	28	16	M	C

## Sheet: Legend
Abbreviation	Explanation
ID	A number to identify each individual subject. For instance, subject #1 in the Placebo sheet is the same as subject #1 in the Levodopa sheet, but the data were collected on different days
Diagnosis	Diagnosis for each subject
TS	Diagnosis = Tourette's syndrome or chronic tic disorder
TFC	Diagnosis = Tic-free control subject
Day	Identifies the study day (day 1 vs. day 2) on which the subject received the infusion in question (levodopa vs. placebo)
Baseline	Values at baseline, prior to infusion
Post levodopa	Values after infusion of levodopa
Post placebo	Values after infusion of placebo
Supine	Parameters measured while subject was supine
Standing	Parameters measured while subject was standing
Change	Change in parameter between when subject went from supine to standing: (change) = (standing value) - (supine value)
SBP	Systolic blood pressure in mm Hg
DBP	Diastolic blood pressure in mm Hg
Pulse	Pulse in beats per minute
not done	Value not collected
#VALUE!	Change could not be calculated because one of the parameters was not available
Age	Age of subject at time of study in years
Handedness	Subject's reported dominant hand
Education	Subject's total years of formal education
Sex	Subject's sex (M or F)
Ethnicity	Ethnic background (C = Caucasian, AS = Asian, AA = African-American; patients of more than one race had both noted)
